# Supplementary material for: Pyrroline-5-Carboxylate Reductase-2 Promotes Colorectal Carcinogenesis by Modulating Microtubule-Associated Serine/Threonine Kinase-like/Wnt/β-Catenin Signaling
Source: MDPI journal article supplement (doi:10.3390/cells12141883), 2023-07-18
Supplement: s1 [file s1]

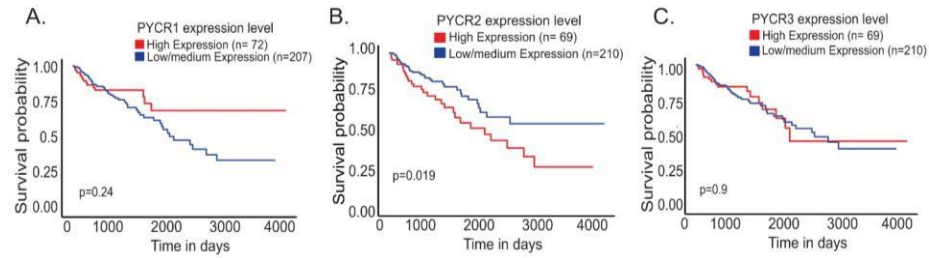

**Figure S1. PYCR2 expression in CRC significantly associated with poor patient survival. (A)** The Kaplan-Meier (Km) plot survival probability analysis for PYCR1 in CRC patients ( $p=0.24$ ). **(B)** The Km plot analysis for survival probability of CRC patient with PYCR2 expression ( $p=0.019$ ). **(C)** The Km plot analysis for survival probability of CRC patient with PYCR3 expression ( $p=0.9$ ).

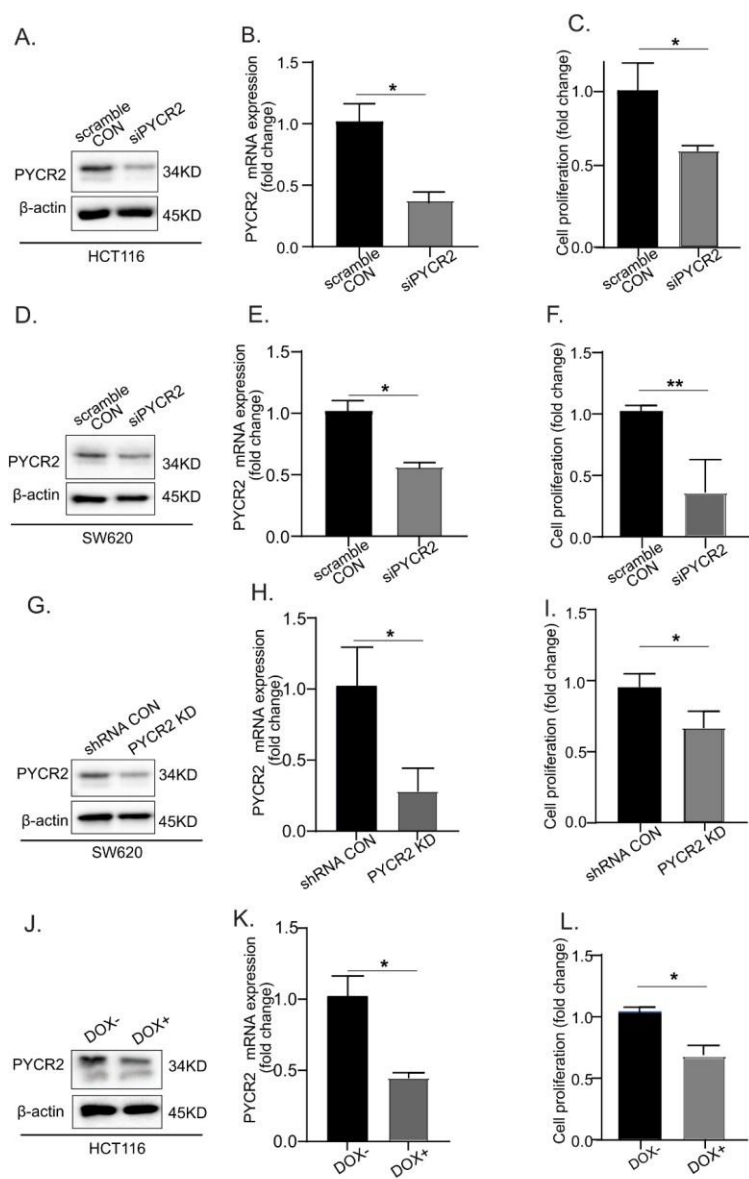

S Fig 2

**Figure S2. Effects of PYCR2 loss-of-expression in CRC cells using different genetic manipulation tools. (A-F)** The loss of function of PYCR2 was performed by using the anti-Human PYCR2 siRNA in HCT116 and SW620 cells. Representatives

immunoblot, and RT-qPCR analysis for PYCR2 mRNA for HCT116, and SW620 respectively and cell proliferation assay for HCT116 and SW620 cells respectively. **(G-I)** PYCR2 knockdown using constitutive shRNA plasmid in SW620 cells. Representative immunoblots of PYCR2 mRNA expression and cell proliferation analysis. **(J-L)** PYCR2 knock down using doxycycline inducible shRNA plasmid in HCT116 cells. The representative images of immunoblots, PYCR2 mRNA expression analysis and cell proliferation assay. \* $p < 0.05$ , \*\* $p < 0.01$ .

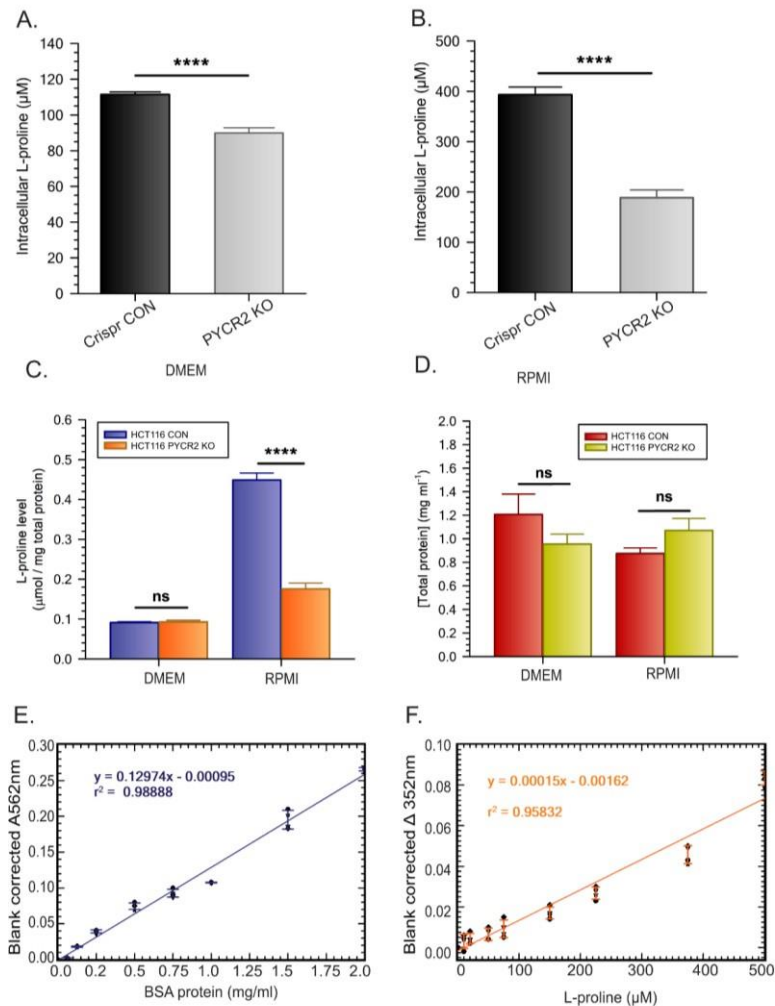

**Figure S3. PYCR2 regulates the intracellular proline level.** Intracellular L-proline concentrations in HCT116 control and PYCR2-KO (knock out) cells cultured in DMEM. **(A)** and in RPMI-1640. **(B)**. Quantification was performed using modified acid ninhydrin assay. **(C)** Normalized intracellular L-proline levels in HCT116 cells cultured in different growth media and collected at  $10^5$  cells. Data plotted as mean  $\pm$  SEM of (n=3) biological replicates, each in triplicate. L-proline concentration values in ( $\mu$ M) units measured by using modified acid ninhydrin assay, were normalized to corresponding total protein concentration values in ( $\text{mg ml}^{-1}$ ) units measured by using BCA Pierce protein assay, to express vertical axis as intracellular L-proline level in ( $\mu\text{mol/mg}$  total protein) units. **(D)** Total protein concentrations in HCT116 cells cultured in different growth media and quantified by using BCA Pierce protein assay. Data plotted as mean + SEM of (n=3) biological replicates, each in triplicate. **(E)** BSA known protein concentration standards' calibration plot using BCA Pierce protein assay. **(F)** L-proline known concentration standards' calibration plot using modified acid ninhydrin assay. Statistical significance was determined by Student's t-test, \*\*\*\*,  $p < 0.0001$ , ns, not statistically significant.

$$\text{L - proline level } (\mu\text{mol/mg total protein}) = \frac{\text{L - proline concentration } (\mu\text{mol L}^{-1})}{\text{Total protein concentration } (\text{mg mL}^{-1})} \times \frac{1 \text{ L}}{10^3 \text{ mL}}$$

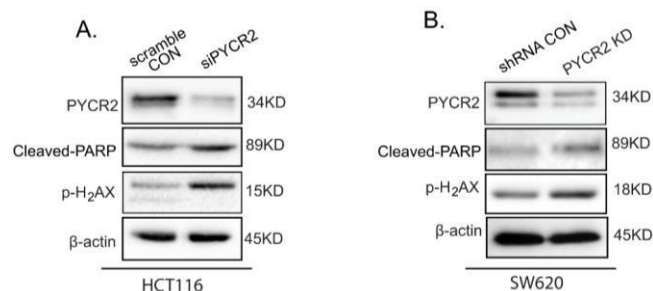

**Figure S4. Effects of transient (siRNA-mediated) and constitutive (shRNA plasmid) PYCR2-KD upon markers of apoptosis/cell death in HCT116 and SW620 cells. (A-B)** The immunoblot analysis for p-H<sub>2</sub>AX and cleaved PARP expression after PYCR2 knock down.

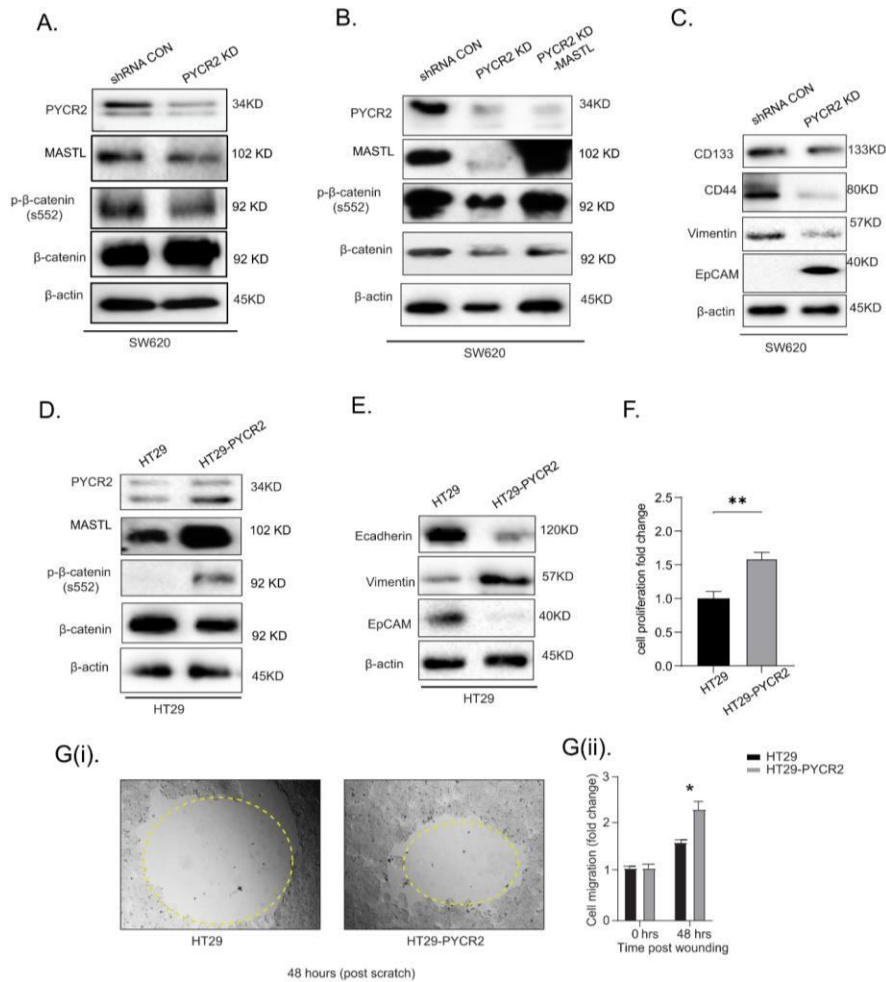

**Figure S5. PYCR2 modulates the MASTL/Wnt/β-catenin-signaling. (A-B)** Representative immunoblot analysis to investigate the expression of MASTL/Wnt/β-catenin-signaling in control, PYCR2 KD and MASTL overexpression in SW620 cells. **(C)** Immunoblot analysis for CSCs and EMT markers in PYCR2-KD SW620 cells. **(D-E)** Immunoblot analysis of MASTL/Wnt/β-catenin-signaling along with EMT markers in HT29-PYCR2 cells. **(F-Gi-ii)** Cell proliferation and cell migration assay in control and HT29-PYCR2 cells. \* $p < 0.05$ , \*\* $p < 0.01$

Table S1. List of siRNA, shRNA, Crispr/Cas9, pCDNA3 PYCR2 and MASTL cDNA clone used in study

| Name                                                      | Company         | Catalogue           | Sequence                                                                                                                                                                                                                                                                                                                                                                         |
|-----------------------------------------------------------|-----------------|---------------------|----------------------------------------------------------------------------------------------------------------------------------------------------------------------------------------------------------------------------------------------------------------------------------------------------------------------------------------------------------------------------------|
| Human Anti-PYCR2 siRNA                                    | Ambion™         | AM16708             | Sense: GGUCCUUGUGAUAAAACCUtt<br>Antisense: AGGUUUUAUCACAAGGACCTg                                                                                                                                                                                                                                                                                                                 |
| Human Anti-PYCR2 shRNA                                    | Sigma Millipore | TRCN0000046368      | GCCCTTAAGAAGACCCTCTTA                                                                                                                                                                                                                                                                                                                                                            |
| SMARTvector™ Inducible Human PYCR2 shRNA                  | Dharmacon       | V3SH11252-226257373 | AGCAGCGTACGCAGGGTTG                                                                                                                                                                                                                                                                                                                                                              |
| 3x sgRNA/Cas9 all-in-one expression clone targeting PYCR2 | Genecopoeia     | HCP262887-CG12-3-B  | a)<br>atccGTGAACCGCGGACCATGAGCGGTTTTAGAGCTAGAAA<br>TAGCAAGTTAAAATAAGGCTAGTCCGTTATCAACTTGAAAA<br>GTGGCACCGAGTCGGTGCTTTTTT<br>b)<br>atccGAGCTGGCCTATGCTCTGGCGGTTTTAGAGCTAGAAA<br>TAGCAAGTTAAAATAAGGCTAGTCCGTTATCAACTTGAAAA<br>AGTGGCACCGAGTCGGTGCTTTTTT<br>c)<br>atccGAAGCCCCGCGCCAGAGCATGTTTTAGAGCTAGAAAT<br>AGCAAGTTAAAATAAGGCTAGTCCGTTATCAACTTGAAAA<br>GTGGCACCGAGTCGGTGCTTTTTT |
| MASTL PCS6 (pCMVSPORT6)                                   | Transomic       | BC009107            |                                                                                                                                                                                                                                                                                                                                                                                  |
| pCDNA3 PYCR2                                              |                 |                     | Prepared in lab                                                                                                                                                                                                                                                                                                                                                                  |

**Table S2. List of antibodies and reagents with their dilution used in the study.**

| SN | Name of Antibodies/chemicals    | Company         | Catalog #  | Dilution used                |
|----|---------------------------------|-----------------|------------|------------------------------|
| 1  | PYCR2                           | ProteinTech     | 17146-1-AP | 1:1000 (WB) and 1:250 (IHC)  |
| 2  | $\beta$ -actin                  | ProteinTech     | 20536-1-AP | 1:20000                      |
| 3  | p-H2AX                          | Cell Signaling  | 2577       | 1:1000 (WB) and 1:500 (IHC)  |
| 4  | Cleaved PARP                    | Cell Signaling  | 5625S      | 1:1000 (WB)                  |
| 5  | p-AKT                           | Cell Signaling  | 4060       | 1:1000 (WB)                  |
| 6  | AKT                             | Santa Cruz      | Sc-5298    | 1:1000 (WB)                  |
| 7  | Cyclin D1                       | ABclonal        | A19038     | 1:1000 (WB)                  |
| 8  | Cleaved caspase 3               | Cell Signaling  | 9664S      | 1:1000 (WB) and 1:1000 (IHC) |
| 9  | Mastl                           | Sigma Millipore | MABT372    | 1:1000 (WB)                  |
| 10 | p- $\beta$ -catenin             | Cell Signaling  | 5651S      | 1:1000 (WB)                  |
| 11 | $\beta$ -catenin                | BD Bioscience   | 610154     | 1:1000 (WB)                  |
| 12 | EpCam                           | Cell Signaling  | 3599S      | 1:500 (IF)/1:1000 (WB)       |
| 13 | Ecadherin                       | BD Bioscience   | 610405     | 1:1000 (WB)                  |
| 14 | Vimentin                        | Cell Signaling  | 5741S      | 1:1000 (WB)                  |
| 15 | CD133                           | Cell Signaling  | 64326T     | 1:1000 (WB)                  |
| 16 | CD44                            | Cell Signaling  | 3578S      | 1:1000 (WB)                  |
| 17 | SOX2                            | Cell Signaling  | 2748S      | 1:1000 (WB)                  |
| 18 | Precision plus protein standard | Biorad          | 1610375    |                              |
| 19 | GKI                             |                 |            |                              |

**Spheroid media protocol (50ml)**

- B-27 supplement (# 17504044 Thermofisher) -1X
- HEPES (# 15630106 Thermofisher) - 10mM
- DMEM/F-12, GlutaMAX (# 10565018 Thermofisher)- Remaining volume

**Table S3. List of qPCR primers used in study.**

**PYCR1**

|   |         |                        |
|---|---------|------------------------|
| 1 | Forward | GGACAAGGTGAAGCTGGACT   |
|   | Reverse | AGGACGTGTCAATCCTTGC    |
| 2 | Forward | TTTCTGCTCTCAGGAAGATG   |
|   | Reverse | ACCACAATGTGTCTGTCCTC   |
| 3 | Forward | AAGATGGCAGGCTTGTGGAGCA |
|   | Reverse | CAGAGCATCCAGGGCTGTGAAA |

**PYCR2**

|   |         |                        |
|---|---------|------------------------|
| 1 | Forward | TCCCTCGCTGAGGGGGTTCGT  |
|   | Reverse | CCATCTTCTGAGCGCGGACACC |
| 2 | Forward | AGATGGGTGTGAACCTGACA   |
|   | Reverse | CTTCACAGCCAGAAACAGGA   |
| 3 | Forward | CGGCTCACAAGATAATAGCC   |
|   | Reverse | TTCACCGTCTCCTTGTGTC    |

**PYCR3**

|   |         |                        |
|---|---------|------------------------|
| 1 | Forward | CCCAGACCCTGCTGGGGGACG  |
|   | Reverse | CTCCACGGCGCTCATGGTGG   |
| 2 | Forward | GTGGAAGCTCAGCACATACTGG |
|   | Reverse | CTTGGTGGCAAAGATGACGAGC |

**CD133**

|         |                       |
|---------|-----------------------|
| Forward | GGTGCTGTTTCATGTTCTCGA |
| Reverse | ACCGACTGAGACCCAACATC  |

**CD44**

|         |                        |
|---------|------------------------|
| Forward | CCAGAAGGAACAGTGGTTTGGC |
| Reverse | ACTGTCCTCTGGGCTTGGTGTT |

**Sox2**

|         |                      |
|---------|----------------------|
| Forward | GAGCTTTGCAGGAAGTTTGC |
| Reverse | GCAAGAAGCCTCTCCTTGAA |

**$\beta$ -actin**

|         |                         |
|---------|-------------------------|
| Forward | CACCATTGGCAATGAGCGGTTTC |
| Reverse | AGGTCTTTCGGATGTCCACGT   |
